# Supplementary material
Source: Springer Nature journal article supplement (https://www.springermedizin.de/resource/supplementary/12885_2012_3637_MOESM5_ESM.pdf/9463958)

## Ba/F3 p185 Bcr-Abl T3151

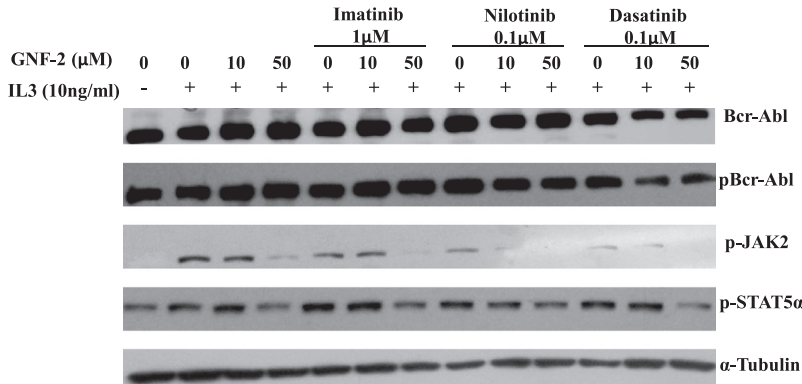pBcr-Abl/ $\alpha$ -tubulin

1.85 1.66 2.01 2.35 2.45 3.15 2.19 2.88 1.1

pJAK2/ $\alpha$ -tubulin

0.0 0.41 0.21 0.42 0.0 0.27 0.0 0.16 0.0

pSTAT5 $\alpha$ / $\alpha$ -tubulin

0.63 0.63 0.61 1.1 0.6 1.1 0.62 1.2 0.38

Supplement: MOESM5 [file 9463958]
